# Supplementary material for: Modeling Biogenic and Anthropogenic Secondary Organic Aerosol inChina
Source: Copernicus journal article supplement (doi:10.5194/acp-2016-687), 2016-08-08
Supplement: Supplementary file 1 [file acp-2016-687-supplement.pdf]

## Modeling Biogenic and Anthropogenic Secondary Organic Aerosol in China

Jianlin Hu<sup>1</sup>, Peng Wang<sup>2</sup>, Qi Ying<sup>1,2,\*</sup>, Hongliang Zhang<sup>3</sup>, Jianjun Chen<sup>4</sup>, Xinlei Ge<sup>1</sup>, Xinghua Li<sup>5</sup>, Jingkun Jiang<sup>6</sup>, Shuxiao Wang<sup>6</sup>, Jie Zhang<sup>7,9</sup>, Yu Zhao<sup>6,9</sup>, Yingyi Zhang<sup>10</sup>

<sup>1</sup> Jiangsu Key Laboratory of Atmospheric Environment Monitoring and Pollution Control, Jiangsu Engineering Technology Research Center of Environmental Cleaning Materials, Collaborative Innovation Center of Atmospheric Environment and Equipment Technology, School of Environmental Science and Engineering, Nanjing University of Information Science & Technology, 219 Ningliu Road, Nanjing 210044, China

<sup>2</sup> Zachry Department of Civil Engineering, Texas A&M University, College Station, TX 77843-3136

<sup>3</sup> Department of Civil and Environmental Engineering, Louisiana State University, Baton Rouge, LA 77803

<sup>4</sup> Air Quality Planning and Science Division, California Air Resources Board, 1001 I Street, Sacramento, CA 95814, USA

<sup>5</sup> School of Chemistry & Environment, Beihang University, Beijing, 100191, China

<sup>6</sup> State Key Joint Laboratory of Environment Simulation and Pollution Control, School of Environment, Tsinghua University, Beijing 100084, China

<sup>7</sup> Jiangsu Provincial Academy of Environmental Science, 176 North Jiangdong Rd., Nanjing, Jiangsu 210036, China

<sup>8</sup> State Key Laboratory of Pollution Control & Resource Reuse and School of the Environment, Nanjing University, 163 Xianlin Ave., Nanjing, Jiangsu 210023, China

<sup>9</sup> Collaborative Innovation Center of Atmospheric Environment and Equipment Technology, CICAEEET, Nanjing, Jiangsu 210044, China

<sup>10</sup> School of Environment and Energy, South China University of Technology, Guangzhou, China

### Supplementary Materials

---

\* Corresponding author. Email: [qying@civil.tamu.edu](mailto:qying@civil.tamu.edu). Phone: (979) 845-9709. Fax: (979) 862-1542.

Table S1 Predicted seasonal average precursor contributions (%) to glyoxal SOA. GLY\_A1 and GLY\_A2: glyoxal SOA from oxidation of aromatics with OH reaction rate  $< 2 \times 10^4 \text{ ppm}^{-1} \text{ min}^{-1}$  and  $> 2 \times 10^4 \text{ ppm}^{-1} \text{ min}^{-1}$ , respectively; GLY\_I: glyoxal from oxidation of isoprene; GLY\_O: glyoxal from direct emissions and oxidation of other precursors

|        | GLY_A1 | GLY_A2 | GLY_I | GLY_O |
|--------|--------|--------|-------|-------|
| Spring | 17.4   | 7.2    | 24.4  | 50.9  |
| Summer | 7.3    | 5.0    | 52.5  | 35.2  |
| Autumn | 16.0   | 9.0    | 25.0  | 49.9  |
| Winter | 18.9   | 12.5   | 7.7   | 60.9  |

Table S2 Predicted seasonal average precursor contributions (%) to methylglyoxal SOA. MGLY\_A1 and MGLY\_A2: glyoxal SOA from oxidation of aromatics with OH reaction rate  $< 2 \times 10^4 \text{ ppm}^{-1} \text{ min}^{-1}$  and  $> 2 \times 10^4 \text{ ppm}^{-1} \text{ min}^{-1}$ , respectively; MGLY\_I: glyoxal from oxidation of isoprene; MGLY\_T: glyoxal from oxidation of monoterpene; MGLY\_O: glyoxal from direct emissions and oxidation of other precursors

|        | MGLY_A1 | MGLY_A2 | MGLY_T | MGLY_I | MGLY_O |
|--------|---------|---------|--------|--------|--------|
| Spring | 14.7    | 12.1    | 0.3    | 56.7   | 16.2   |
| Summer | 4.6     | 5.9     | 0.3    | 84.7   | 4.5    |
| Autumn | 14.2    | 15.4    | 0.3    | 56.6   | 13.5   |
| Winter | 22.7    | 28.9    | 0.2    | 22.5   | 25.7   |

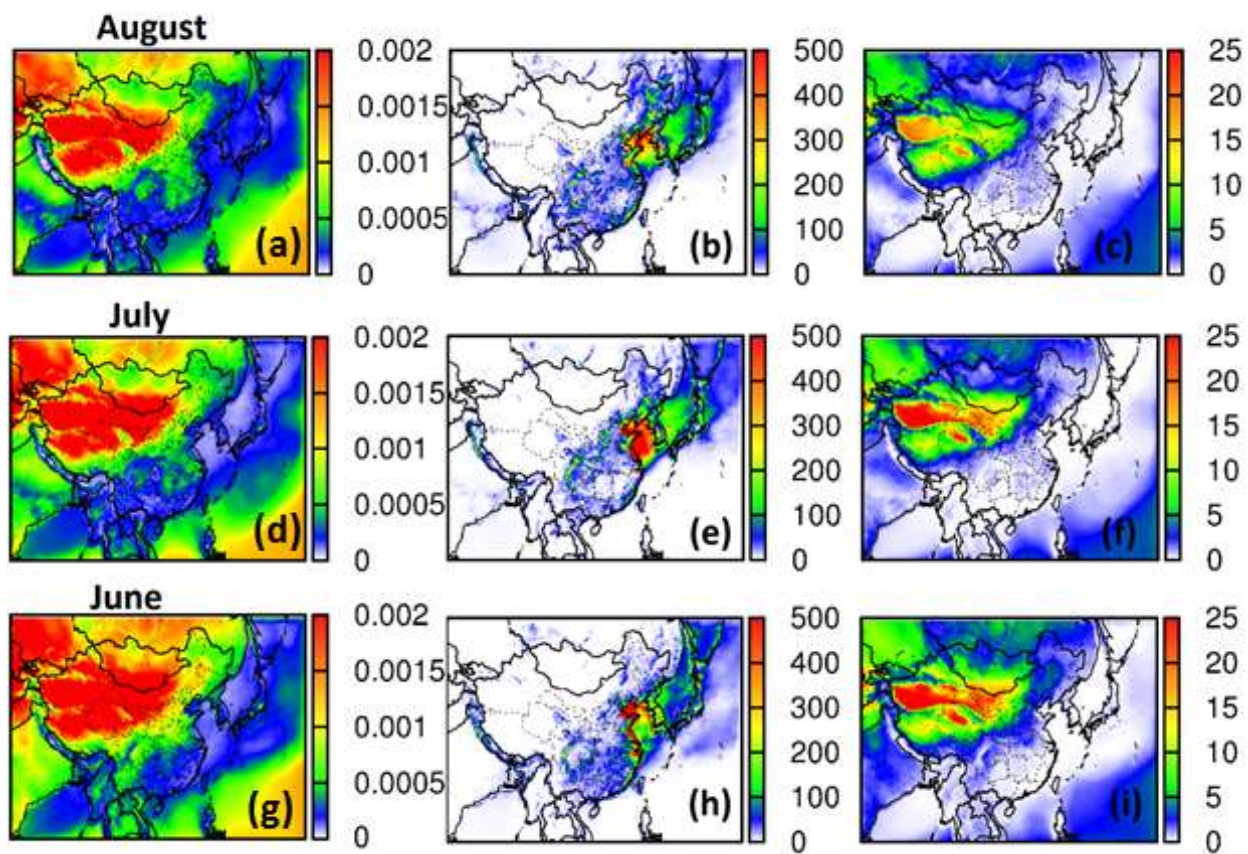

Figure S1 Summertime (a,d,g) uptake coefficients for isoprene epoxides; (b,e,h) aerosol water content ( $\mu\text{g m}^{-3}$ ) and (c,f,i) molality of  $\text{H}^+$  ( $\text{mol kg}^{-1}$  water).

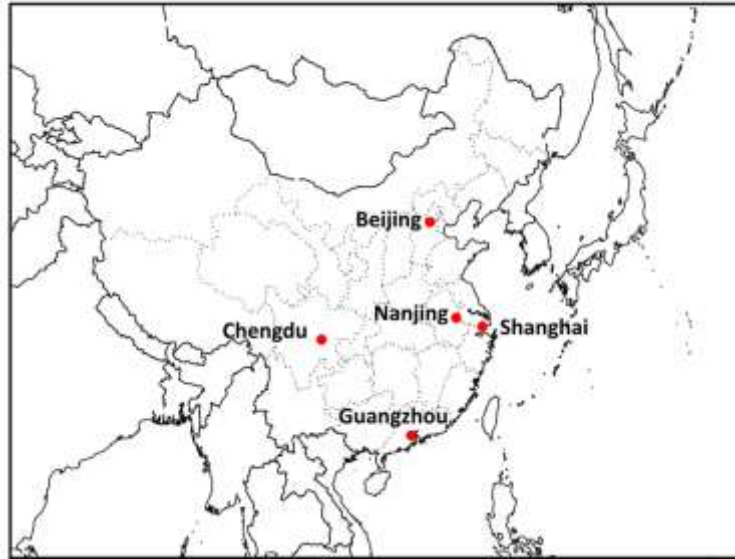

Figure S2 Location of major cities (Beijing, Nanjing, Shanghai, Chengdu and Guangzhou) mentioned in this study.

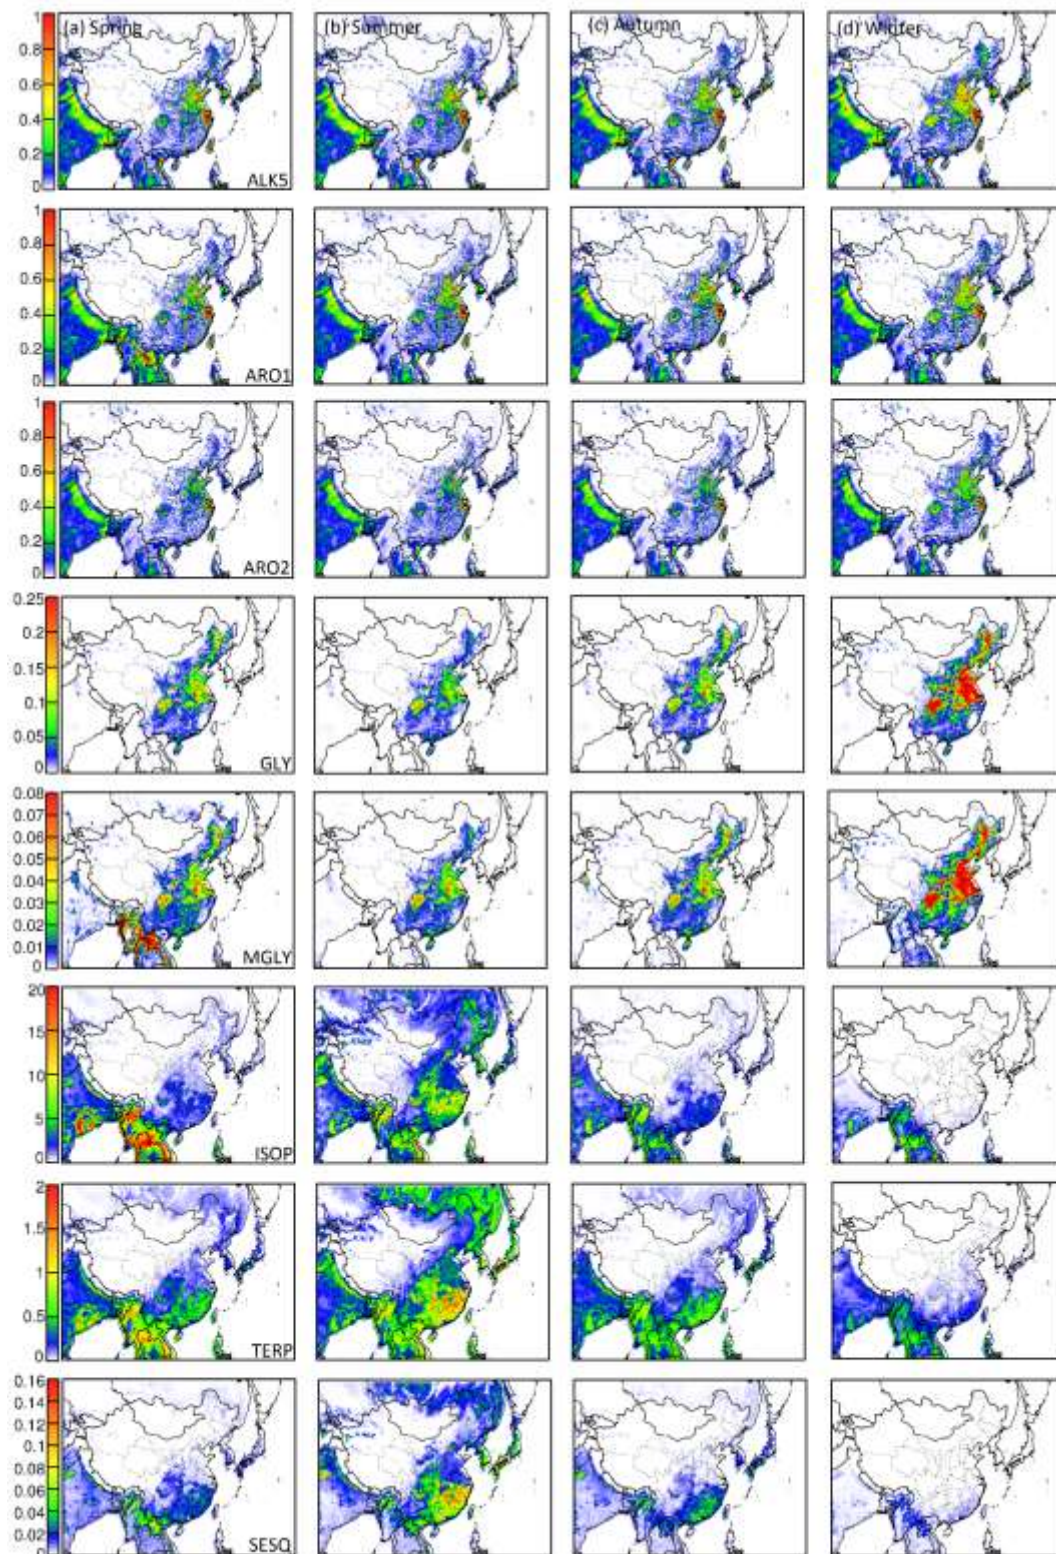

Figure S3 Predicted seasonal average of SOA precursor emission in (a) spring, (b) summer, (c) autumn, and (d) winter 2013. Units are moles  $s^{-1}$ .

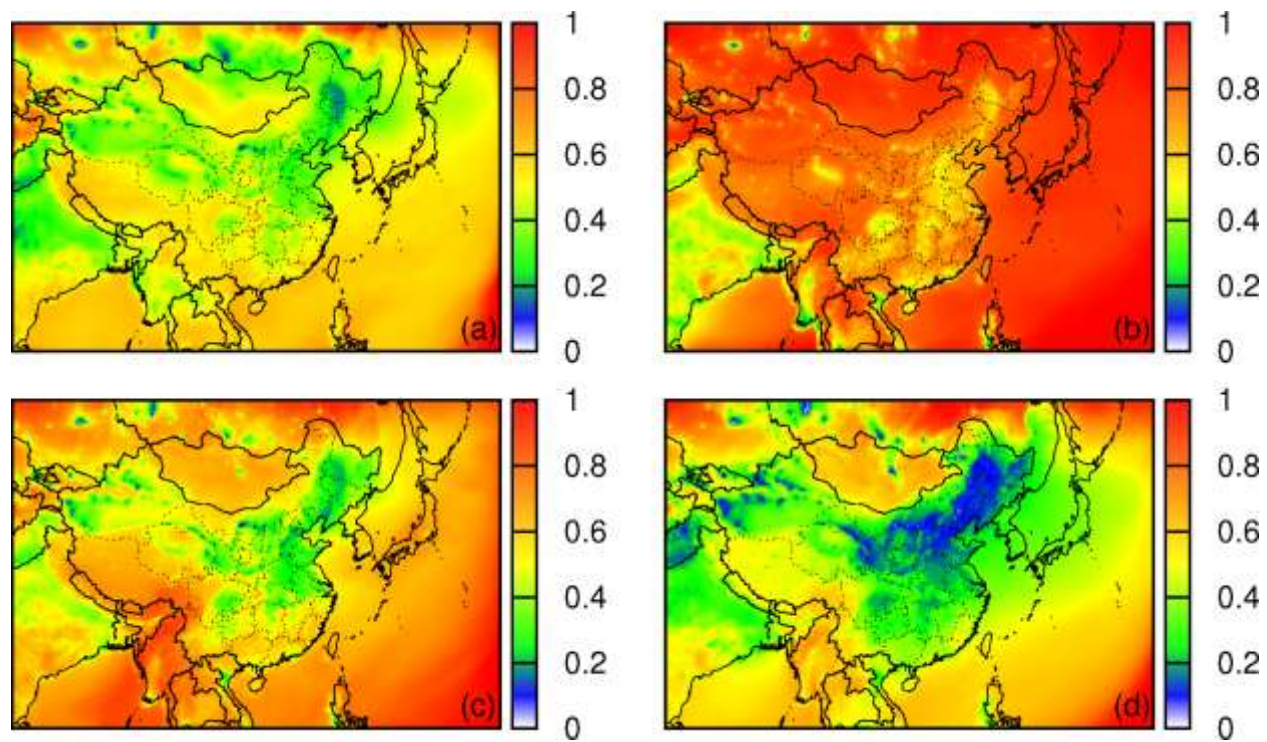

Figure S4 Fractional contributions of predicted SOA to total OA (SOA+POA) for (a) spring, (b) summer, (c) autumn, and (d) winter 2013

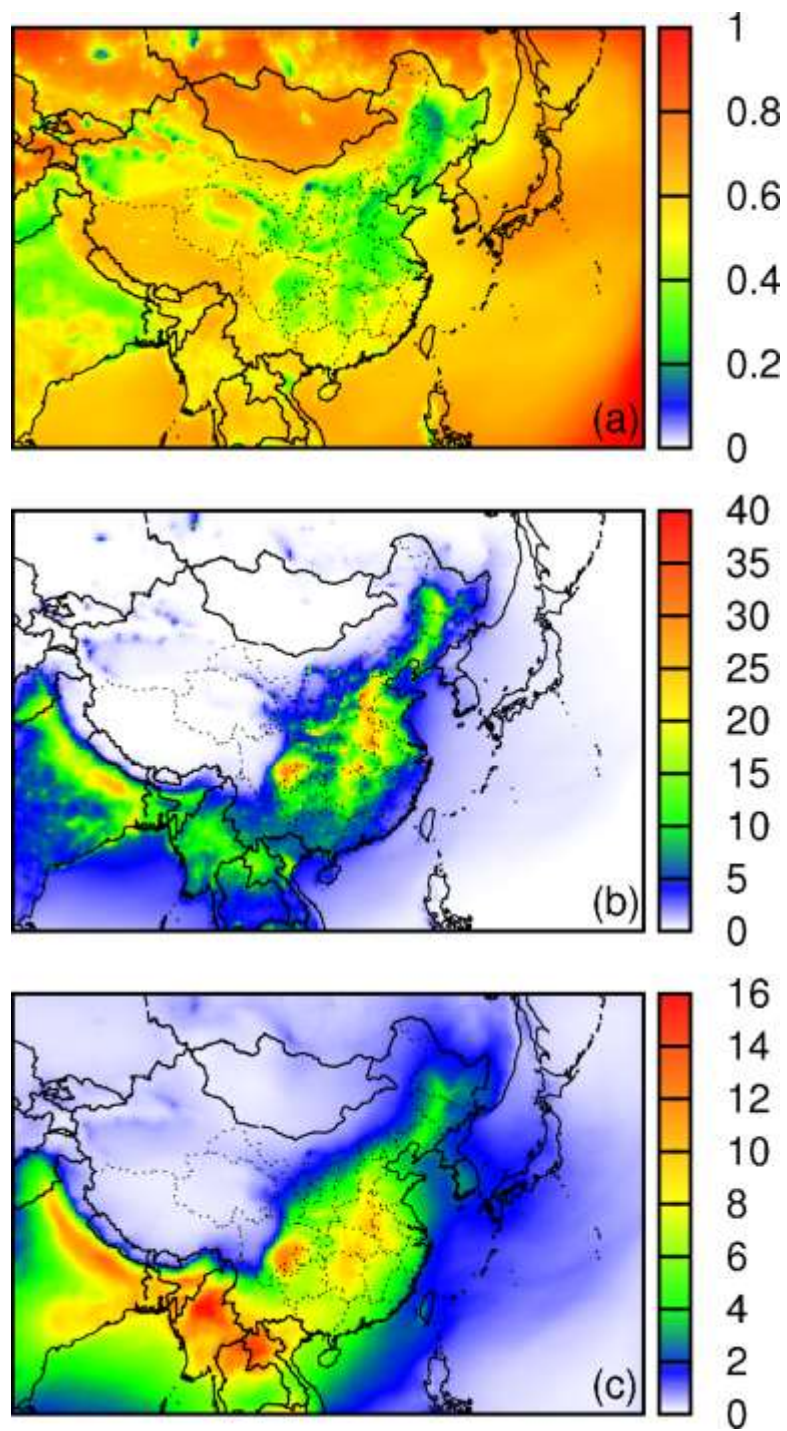

Figure S5 (a) Fractional contributions of predicted annual average SOA to total OA (SOA+POA), (b) annual average POA and (c) annual average SOA. Units are  $\mu\text{g m}^{-3}$ .



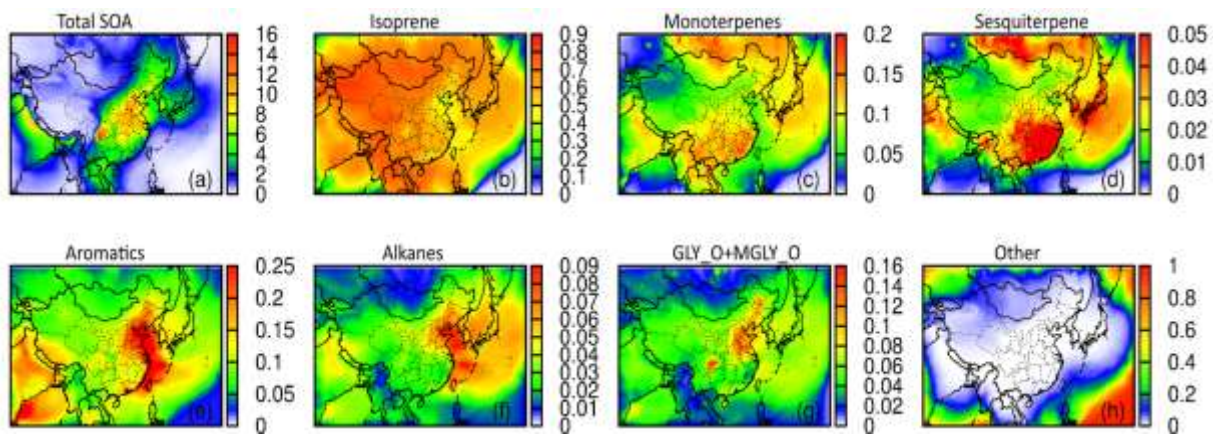

Figure S6 Predicted average SOA concentrations in summer 2013 and relative contributions of different precursors to total SOA.

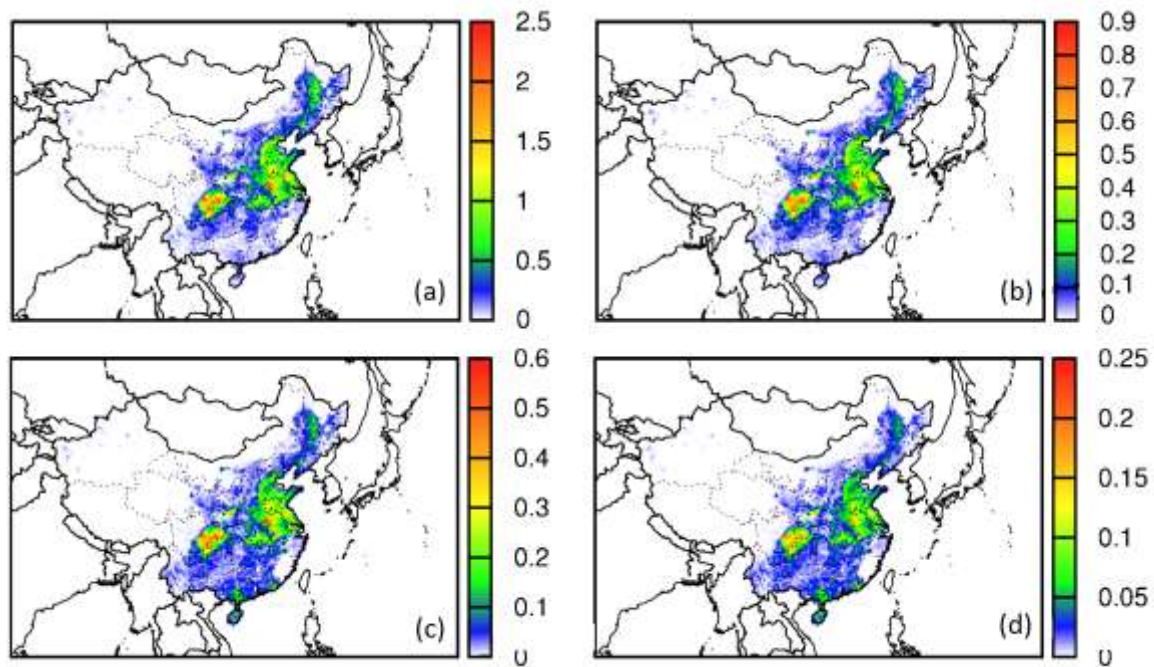

Figure S7 Monthly average emissions of GLY (a,c) and MGLY (b,d) in January and August, 2013.

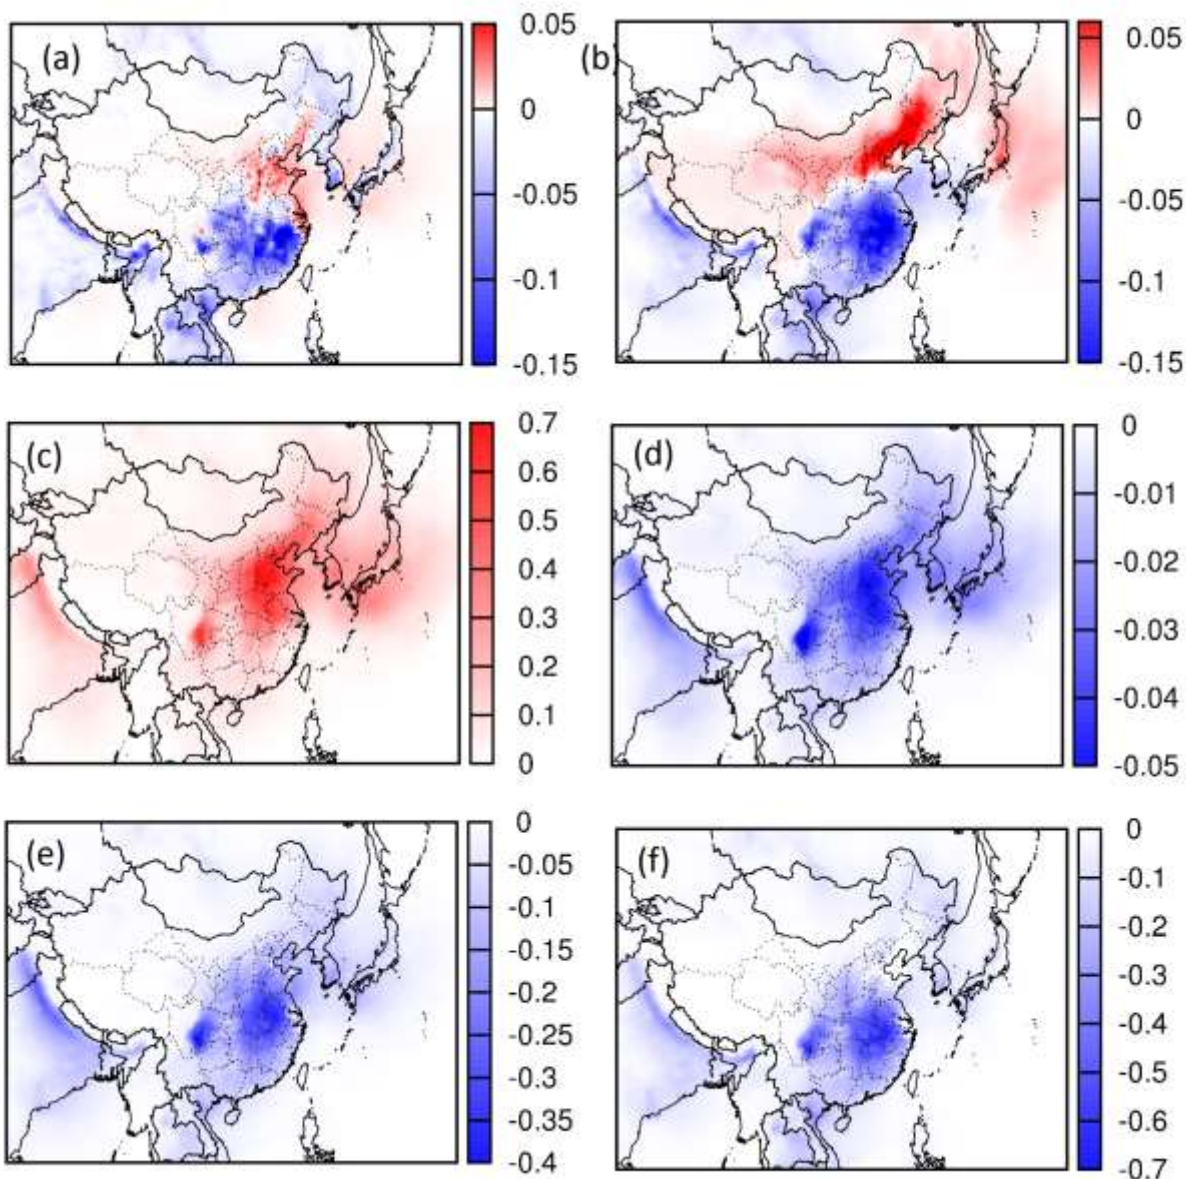

Figure S8 Predicted changes in the spatial distribution of August SOA components (a) semi-volatile, (b) oligomers, (c) IEPOX, (d) MAE, (e) GLY and (f) MGLY due to reduction of NOx emission by 50%. (sensitivity case – base case, units are  $\mu\text{g m}^{-3}$ ).

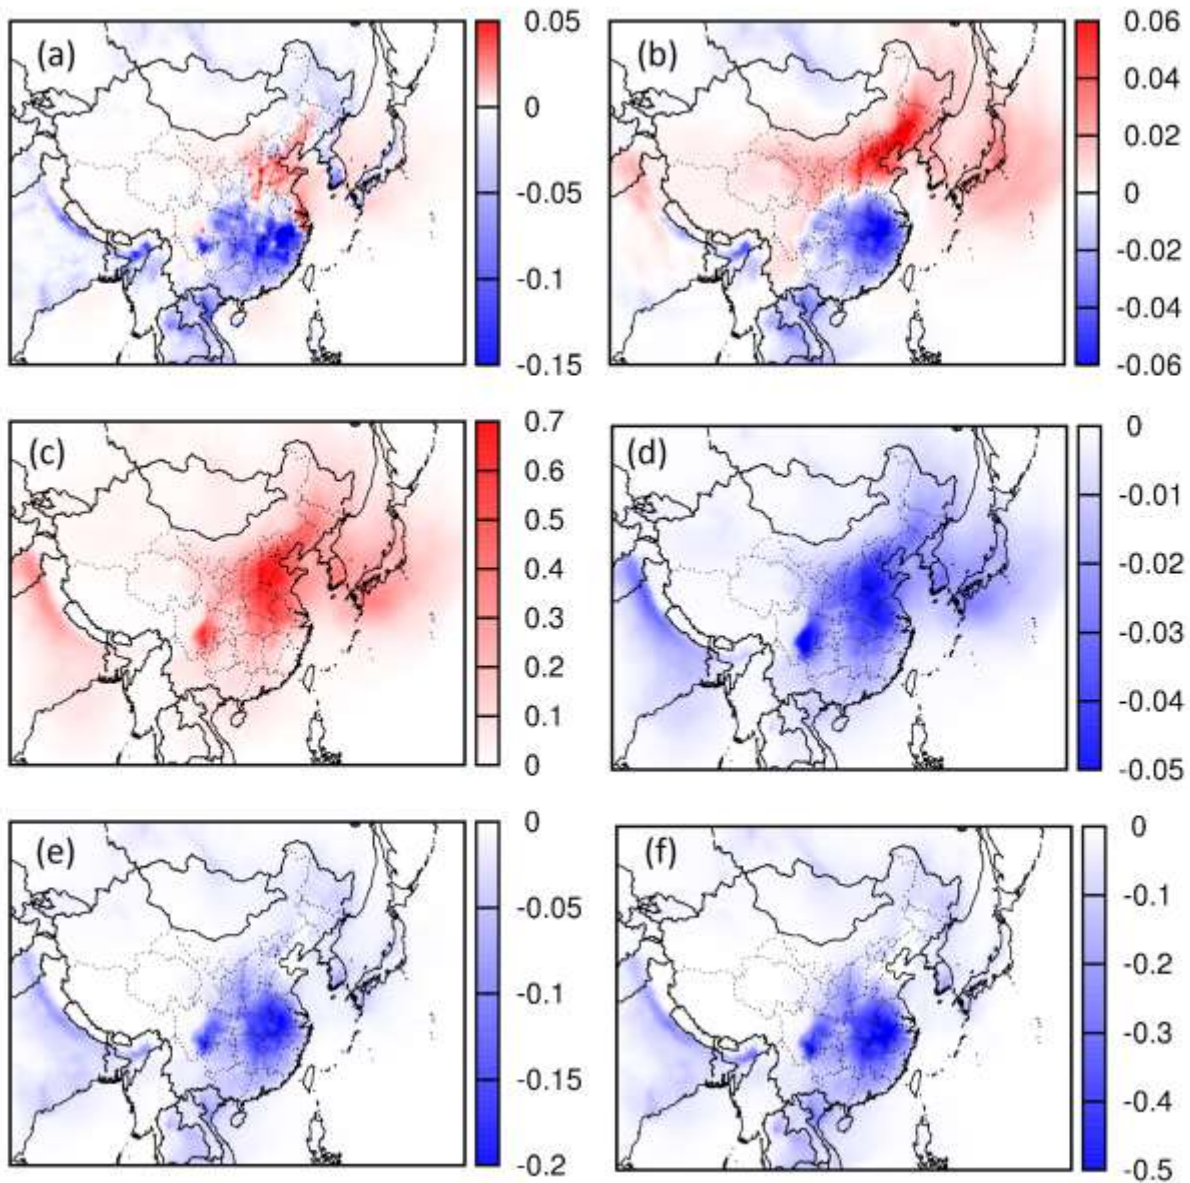

Figure S9 Predicted changes spatial distribution of August **isoprene** SOA components (a) semi-volatile, (b) oligomers, (c) IEPOX, (d) MAE, (e) GLY and (f) MGLY due to reduction of NOx emission by 50%. (sensitivity case – base case, units are  $\mu\text{g m}^{-3}$ ).

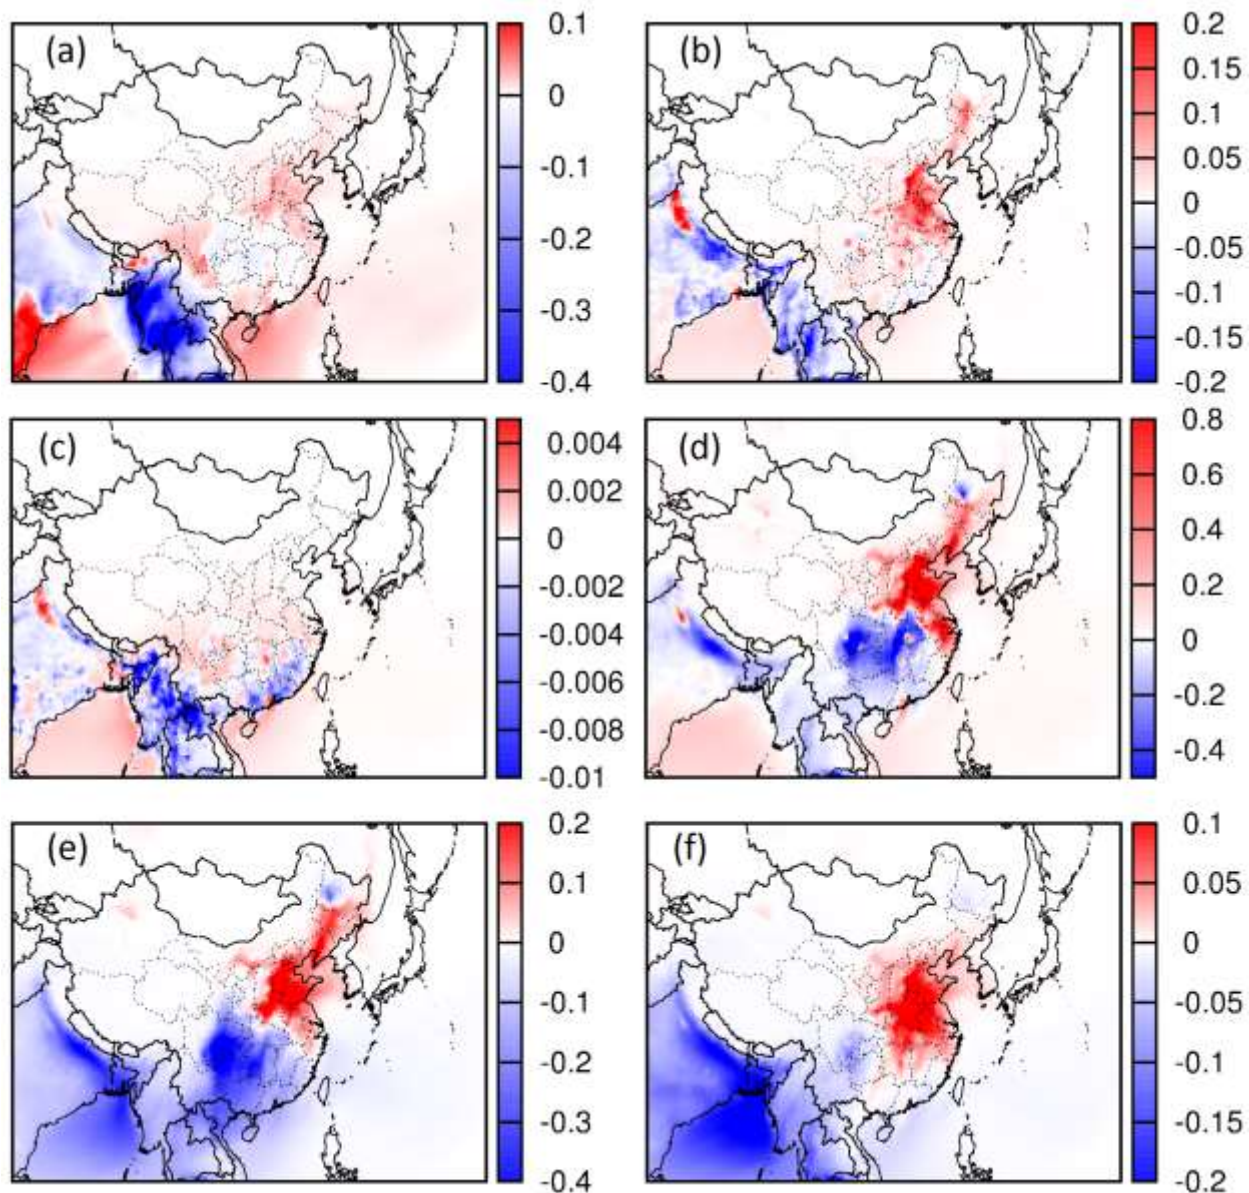

Figure S10 Predicted changes in spatial distribution of January SOA from different precursors, (a) ISOP, (b) TERP, (c) SESQ, (d) ARO1+ARO2, (e) ALK5, and (f) primary GLY+MGLY
